# Supplementary material for: A minimal colloid model of solution crystallization nucleates crystals classically
Source: Royal Society of Chemistry journal article supplement (doi:10.1039/d3sm01609a), 2024-01-01
Supplement: d3sm01609a1.pdf [file d3sm01609a1.pdf]

# Electronic Supplementary Material: A Minimal Colloid Model of Solution Crystallization Nucleates Crystals Classically

Gary Chen, Mariah J. Gallegos, Diego D. Soetrisno, Peter G. Vekilov, and Jacinta C. Conrad

February 8, 2024

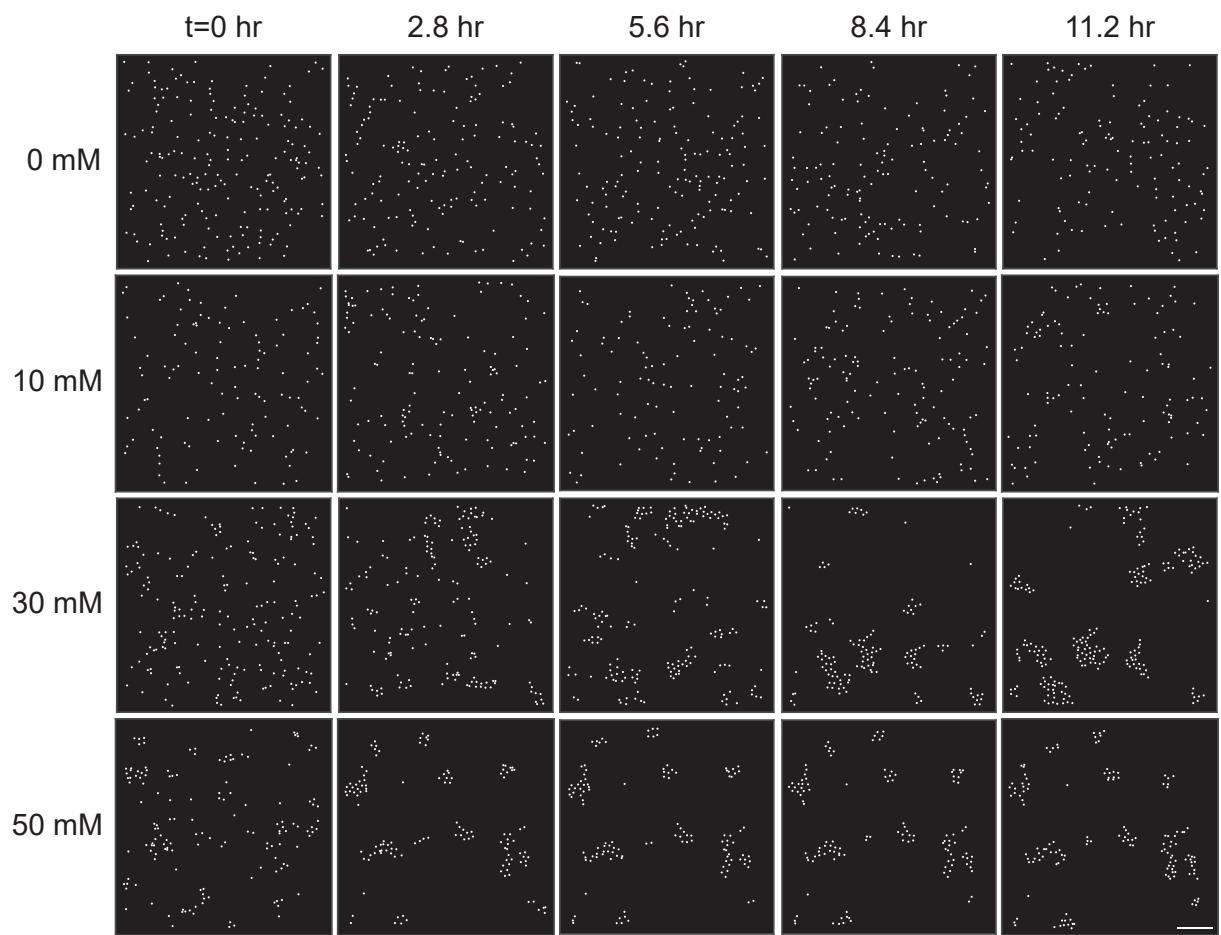

Figure S1: Reconstruction of confocal micrographs using centroid locations from particle tracking algorithms. For all suspensions  $\phi_0 = 0.05$  and  $[\text{PAM}] = 0.3 c/c^*$ ; the NaOH concentrations are indicated on the left side of the images. The scale bar represents  $10 \mu\text{m}$ .

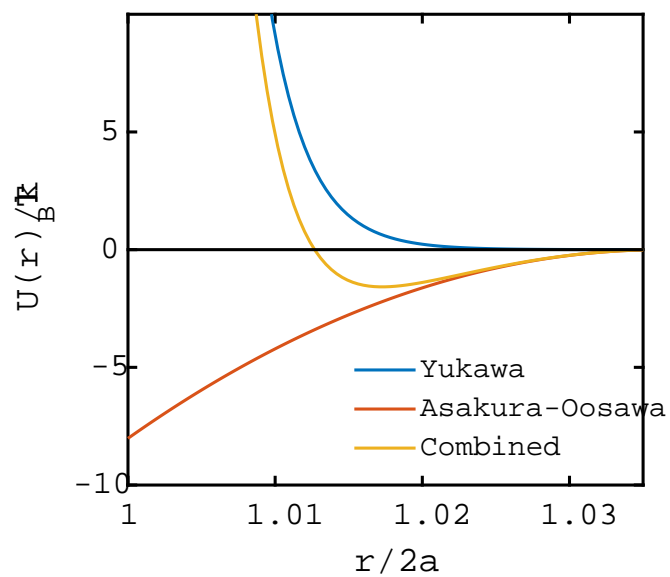

Figure S2: Modeled interparticle potential, combining the Yukawa potential for electrostatic repulsion and the Asakura-Oosawa potential for the depletion interaction, assuming  $[PAM] = 0.3 c/c^*$  and  $[NaOH] = 30$  mM.

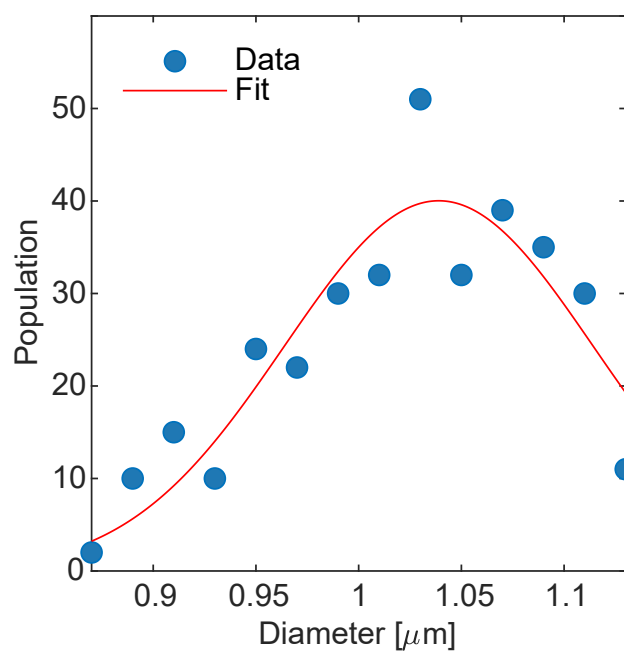

Figure S3: Particle size distribution measured from SEM images using ImageJ. The average particle diameter is  $1.03 \pm 0.06 \mu\text{m}$ . The red curve indicates a Gaussian fit to the distribution.
